# Supplementary material
Source: Springer Nature journal article supplement (https://www.springermedizin.de/resource/supplementary/12913_2001_7_MOESM5_ESM.pdf/9527664)

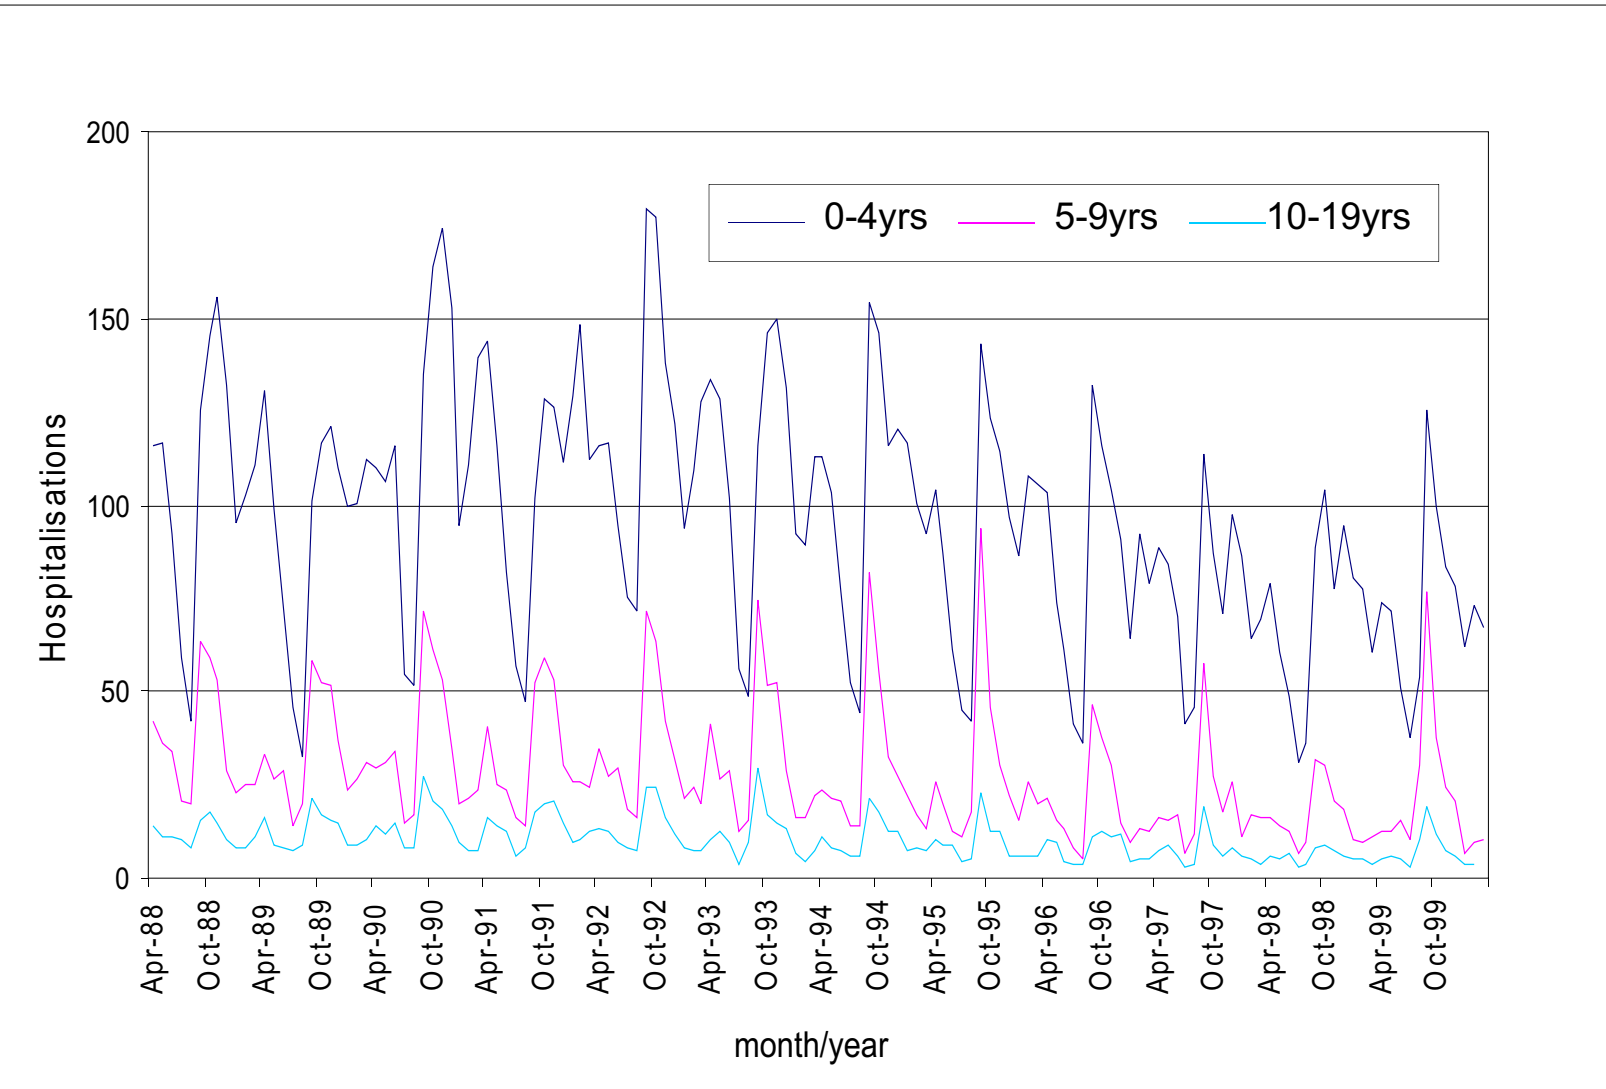

Supplement: MOESM5 [file 9527664]
